# Supplementary material for: Evaluation of robotic exposure among gynecological surgeons: results of survey from the Young European Advocates of Robotic Surgery (YEARS)
Source: Research Square preprint supplement (doi:10.21203/rs.3.rs-8302218/v1), 2025-12-22
Supplement: Supplementary file 1 [file b0b1ddb88eb30227ad4b5c85.docx]

SUPPLEMENTARY MATERIAL

Document S1. Survey.

**Evaluation of Robotic Exposure Among Gynecological Surgeons**

**Title:** Evaluation of robotic exposure among gynecological surgeons: a survey from the Young European Advocates of Robotic Surgery (YEARS)

**Introduction:** The main objective of this survey is to evaluate the surgical experience of young surgeons in the field of gynecology. It is intended for **all OB/GYN residents** up to **gynecologists who finished less than 4 years ago** their fellowship/training program.

**Inclusion Criteria:**

- Trainee/resident enrolled in a national training programme for obstetrics and gynecology
- Junior doctor working in a non-training post
- Gynecology Clinical Fellows
- Recent graduate (within 3 years) of a fellowship/sub-specialty training programme

**1. How old are you?**

- 24 - 29
- 30 - 34
- 35 - 39
- 40 - 44
- ≥45

**2. What is your gender?**

- Female
- Male
- Other (specify)

**3. In what country do you work?**

**4. Where do you work?**

- Tertiary University Hospital
- Private Hospital
- Tertiary center non-university
- Primary or secondary center

**5. Type your hospital’s name:**

**6. What is your gynecological subspecialty or area of interest?**

- Urogynecology
- Benign gynecology (abnormal uterine bleeding, fibroids, endometriosis, etc.)
- Oncological Gynecology
- Other (please specify)

**7. Does your country have a structured fellowship program for your area of interest?**

- Yes
- No

**8. What is your level of experience within your current role?**

- Currently enrolled in a specialty training program/residency in OB/GYN
- In the first half of a post-graduate fellowship/training program
- In the second half of a post-graduate fellowship/training program
- In a non-training position
- Finished a training program and working as a consultant
- I haven’t done any training program

**9. Are (or were) you enrolled in a sub-specialty structured training program?**

- My training program is (or was) a structured fellowship
- My training program is (or was) a non-structured fellowship
- I am (or was) not enrolled in any training program
- Other (please specify)

**10. If you have finished your post-graduate/subspecialty training, are you working in your area of interest?**

- Yes, I am working according to my completed training program
- No, I am working in other competencies
- Other (please specify)

**11. Is there a surgical robotic device at your workplace?**

- Yes
- No

**12. When did your department start to perform robotic surgery?** (Type the year)

**13. What kind of training have you had regarding ROBOTIC SURGERY?**

- None
- Industry course
- National or international society course
- Local hospital course
- Fellowship or subspecialty training
- Other (please specify)

**14. Which robotic device do you use?** (More than one answer possible)

- Da Vinci Si (Intuitive)
- Da Vinci X (Intuitive)
- Da Vinci Xi (Intuitive)
- Hugo (Medtronic)
- Versius (CMR)
- Hominis (Surgical Science)
- Other (please specify)

**15. How often does your department perform robotic surgery?**

- 1 day per week
- 1 day per week
- 1 day every 2 weeks
- < 1 day every 2 weeks
- Never

**16. Is your department currently involved in robotics research?**

- No and it has never been
- No but it was in the past
- Yes, in retrospective studies
- Yes, in prospective studies

**17. How many abdominal/pelvic surgeries (average) does your department perform per year by any approach?**

**18. How many surgeries (average) does your department perform per year by robotic approach?**

**19. Do you operate as a main surgeon by robotic approach?**

- 1 day per week
- 1 day every 2 weeks
- < 1 day every 2 weeks
- <1 day per month
- No

**20. Would you like to operate more often by a robotic approach?**

- No, I am happy with my frequency as main surgeon
- Yes, I would like to operate as a main surgeon more often
- Yes, I would like to initiate performing surgeries as a main surgeon

**21. Which is the main activity performed by robotics in your department?** (More than one is possible)

- Benign surgery (endometriosis, fibroids, fertility surgery, etc.)
- Gynecological Oncology
- Urogynecology
- Breast surgery

**22. Which is the main procedure that you perform as a main surgeon by robotics?**

- Benign Hysterectomy
- Adnexectomy
- Endometriosis resection
- Malignant Hysterectomy + lymph node assessment (SLNB or lymphadenectomy)
- Cytoreduction
- Colposacropexy/colposuspension
- Other (please specify)

**23. Regarding the last question, how do you feel more confident to perform as a main surgeon?**

- Open surgery
- Laparoscopic
- Robotic
- I do not have enough experience yet

**24. Do you feel confident in performing a main procedure of your subspecialty?**

- Not yet, I need to assist more cases as first assistant
- Not yet, I need to assist more cases as second assistant
- Yes, assisted by a consultant
- Yes, assisted by fellows/residents with direct consultant supervision
- Yes, without any supervision

**25. What learning tools do you access most frequently about robotics?** (More than one allowed)

- Dedicated robotic on-site courses
- Webinars
- Society websites
- YouTube
- Social Media
- Other (please specify)

**26. Would you like to do a short observership in order to learn more about robotic surgery?**

- Extremely interested
- Very interested
- Somewhat interested
- Not so interested
- Not at all interested

**27. How do you define access to robotic learning tools (didactic training, courses, videos, etc.)?**

- Easy access, there is a lot of information available
- Moderate access, not enough information available
- Difficult access, very limited content available

**28. Please let us know any comments you have:** [Free text box]
